# Supplementary material for: Self-healing, highly elastic and amphiphilic silicone-based polyurethane for antifouling coatings
Source: Royal Society of Chemistry journal article supplement (doi:10.1039/d0tb02465a), 2020-12-30
Supplement: d0tb02465a1.pdf [file d0tb02465a1.pdf]

## **Supporting Information**

### **Self-healing, Highly Elastic and Amphiphilic Silicone-based Polyurethane for Antifouling Coatings**

Xiaobin Lin, Qingyi Xie, Chunfeng Ma\*, Guangzhao Zhang

*Faculty of Materials Science and Engineering, South China University of Technology,  
Guangzhou 510640, P. R. China*

\*To whom correspondence should be addressed. E-mail: [msmcf@scut.edu.cn](mailto:msmcf@scut.edu.cn)

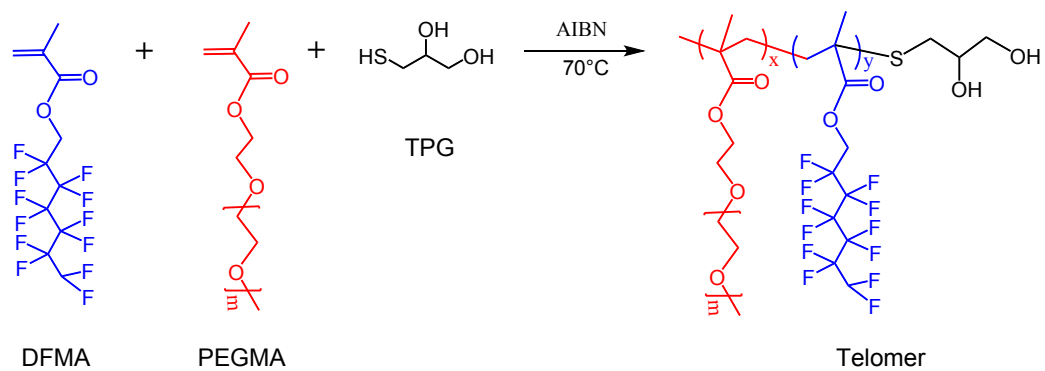

**Fig. S1** Synthetic route of telomer.

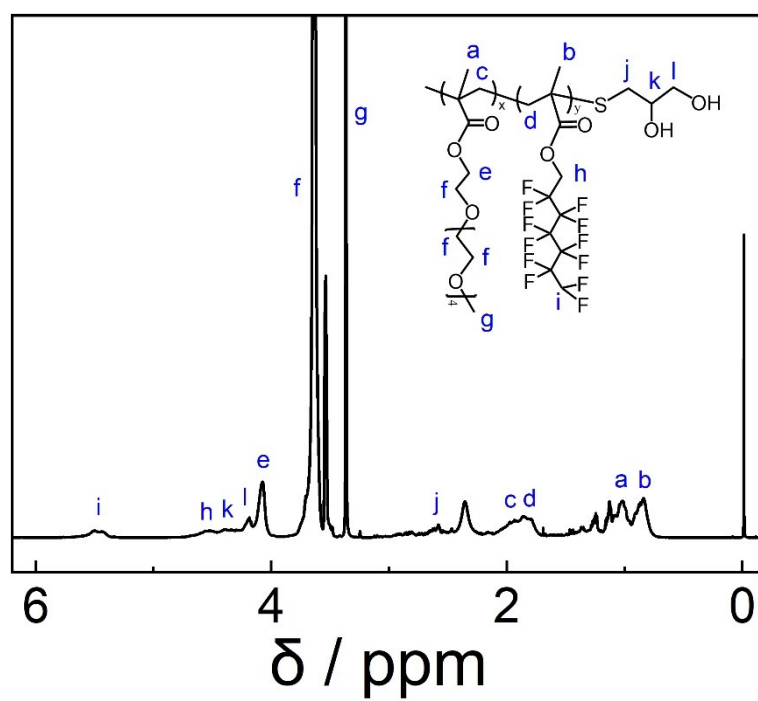

**Fig. S2**  $^1\text{H}$ -NMR spectrum of telomer.

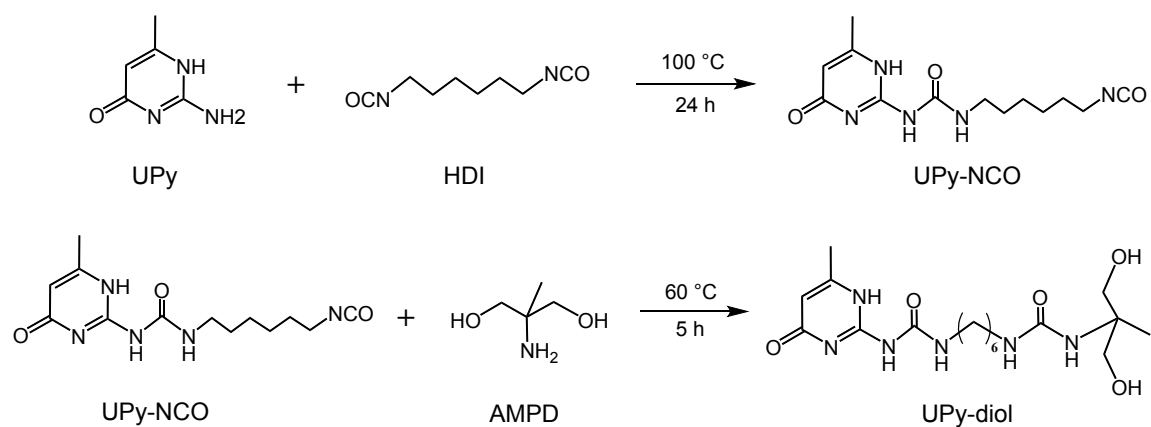

**Fig. S3** Synthetic routes of UPy-NCO and UPy-diol.

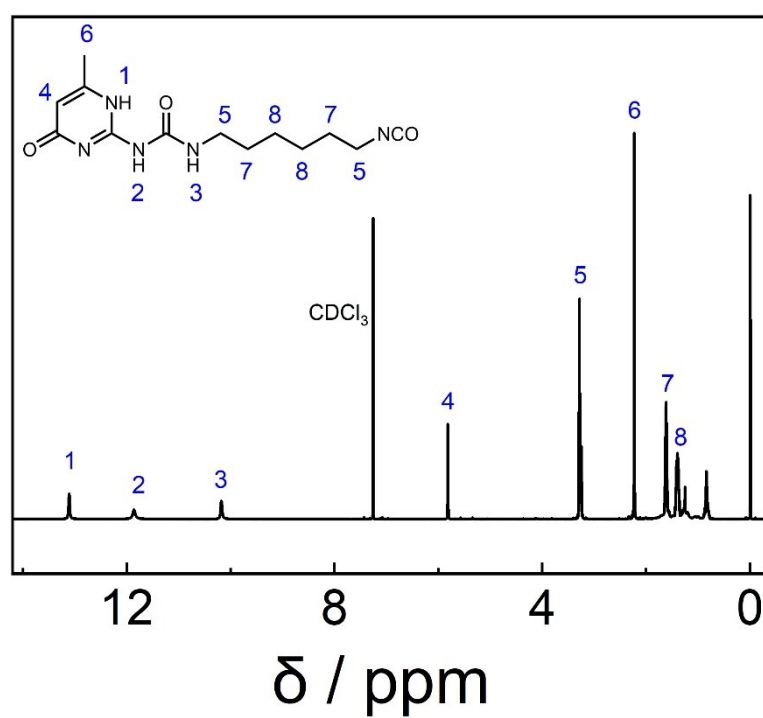

**Fig. S4** <sup>1</sup>H-NMR spectrum of UPy-NCO.

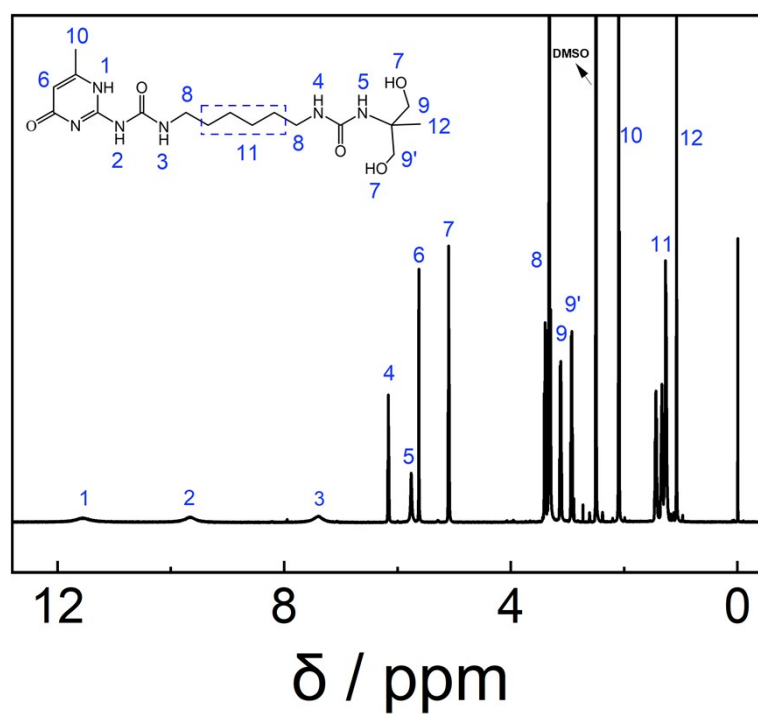

**Fig. S5**  $^1\text{H}$ -NMR spectrum of UPy-diol.

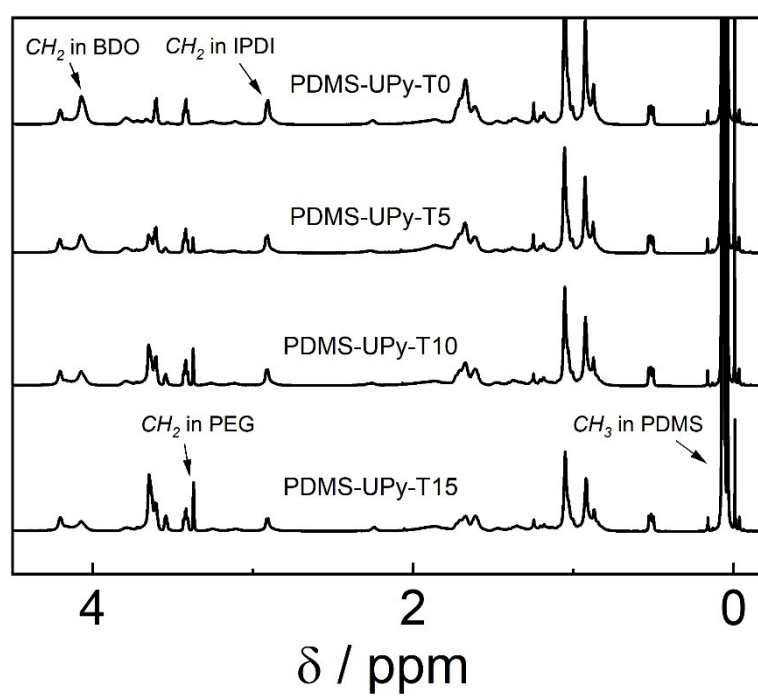

**Fig. S6**  $^1\text{H}$  NMR spectra of PDMS-UPy-Tx polymer.

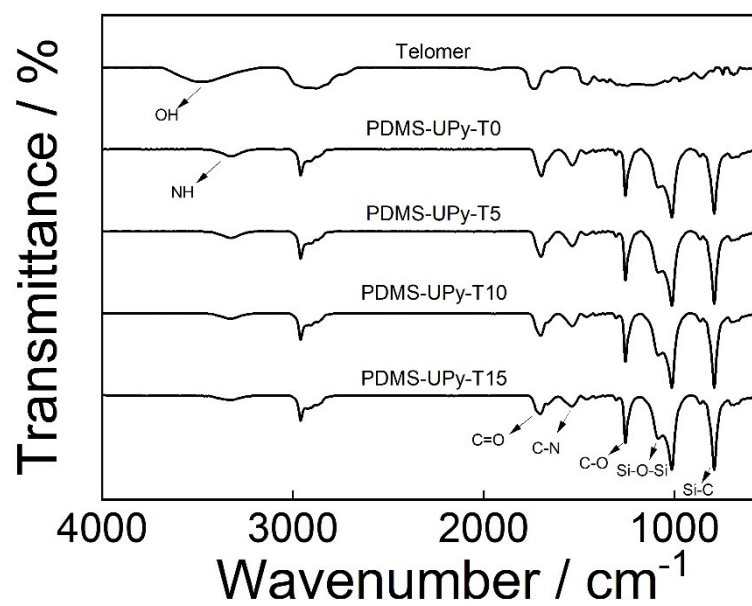

**Fig. S7** FTIR spectra of telomer and PDMS-UPy-Tx polymer.

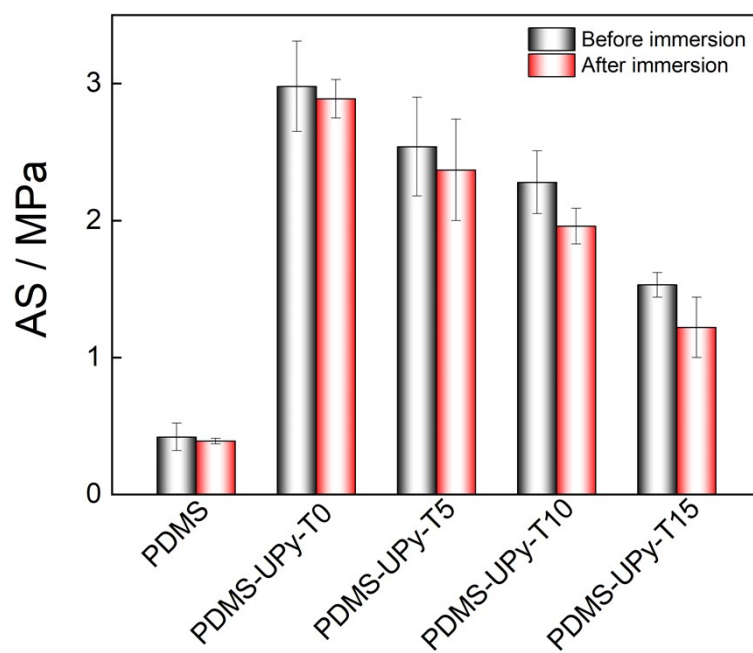

**Fig. S8** Adhesion strength (AS) of PDMS-UPy-Tx on fiberglass epoxy resin panel before and after immersion in ASW for 24 h.

**Table S1** Toughness of PDMS-UPy-Tx.

| Sample       | Toughness (MJ·m <sup>-3</sup> ) |
|--------------|---------------------------------|
| PDMS         | 0.04 ± 0.01                     |
| PDMS-UPy-T0  | 17.10 ± 1.19                    |
| PDMS-UPy-T5  | 15.36 ± 0.83                    |
| PDMS-UPy-T10 | 11.18 ± 0.87                    |
| PDMS-UPy-T15 | 2.86 ± 0.09                     |

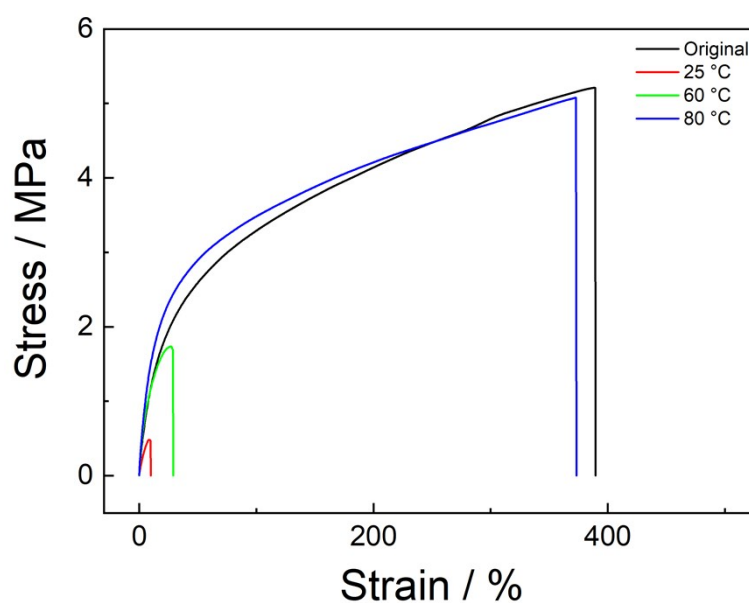**Fig. S9** Stress-strain curves of PDMS-UPy-T0 healed at different temperatures for 48 h.**Table S2** Mechanical properties and healing efficiency of PDMS-UPy-T0 healed at different temperatures for 48 h.

| PDMS-UPy-T0 | Tensile strength (MPa) | Elongation (%) | Elastic modulus (MPa) | Healing efficiency (%) |
|-------------|------------------------|----------------|-----------------------|------------------------|
| Original    | 5.34±0.13              | 394±15         | 15.77±0.04            | —                      |
| 25 °C       | 0.40±0.08              | 10±3           | 8.80±0.53             | 7.5                    |
| 60 °C       | 1.58±0.11              | 28±11          | 15.49±0.20            | 29.5                   |
| 80 °C       | 5.20±0.21              | 373±28         | 16.46±0.83            | 97.4                   |

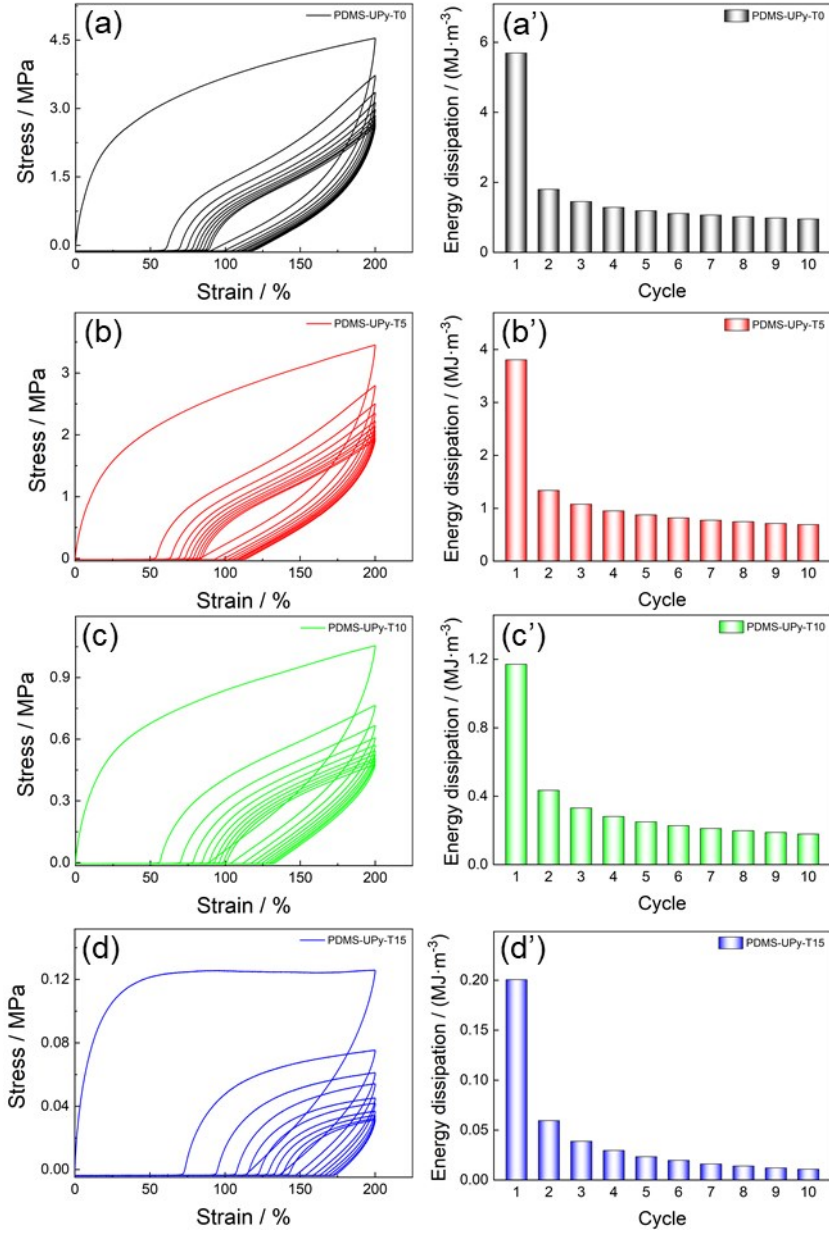

**Fig. S10** Cyclic tensile test and corresponding energy dissipation of PDMS-UPy-T0 (a, a'), PDMS-UPy-T5 (b, b'), PDMS-UPy-T10 (d, d') and PDMS-UPy-T15 (e, e'). The samples were loaded and unloaded for 10 successive cycles.

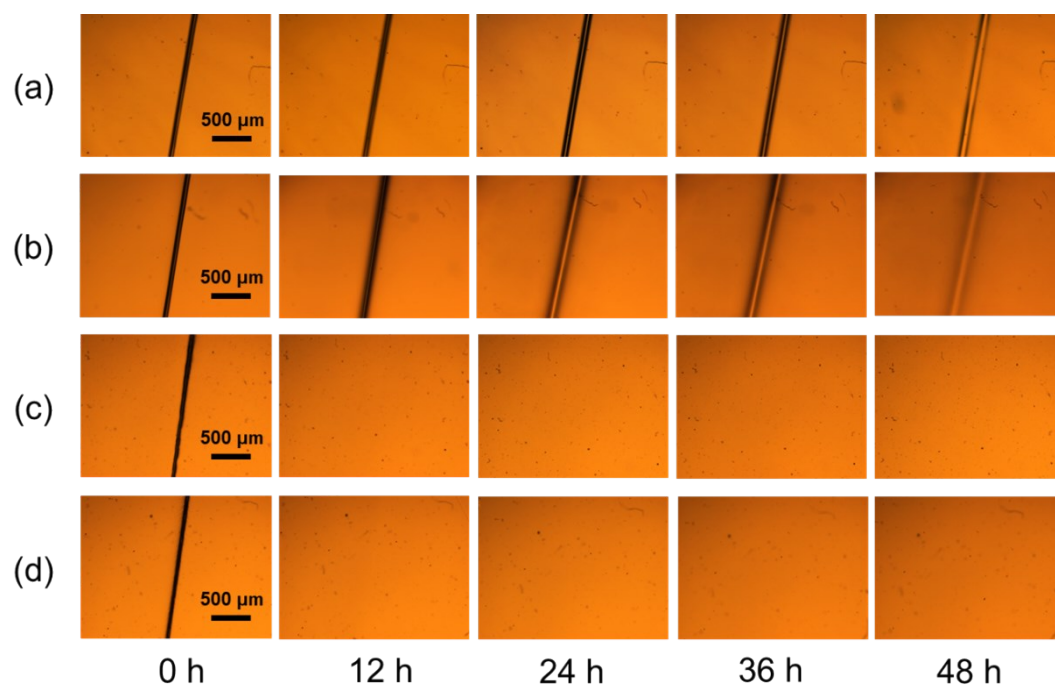

**Fig. S11** Self-healing process of (a) PDMS-UPy-T0, (b) PDMS-UPy-T5, (c) PDMS-UPy-T10, and (d) PDMS-UPy-T15 at 25 °C in air.

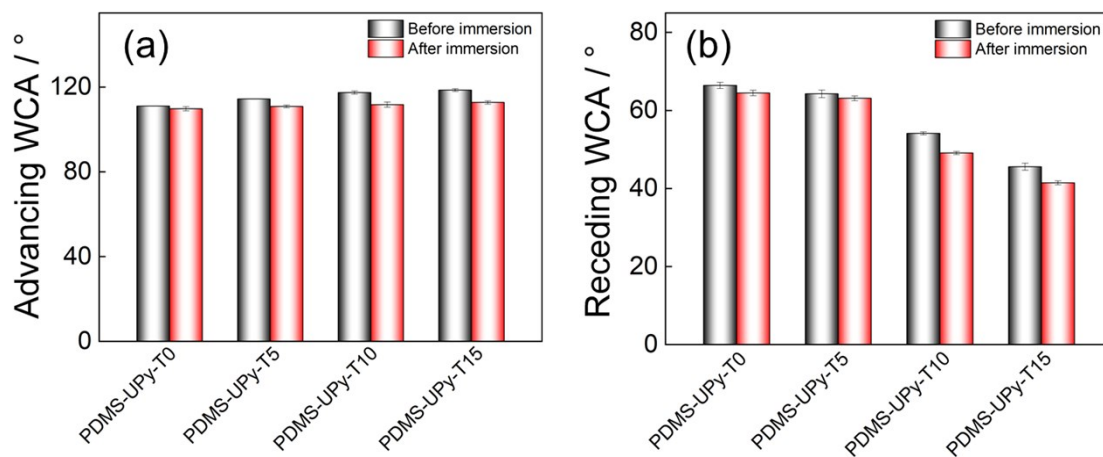

**Fig. S12** (a) Advancing WCA and (b) receding WCA of PDMS-UPy-Tx coatings before and after immersion in ASW.

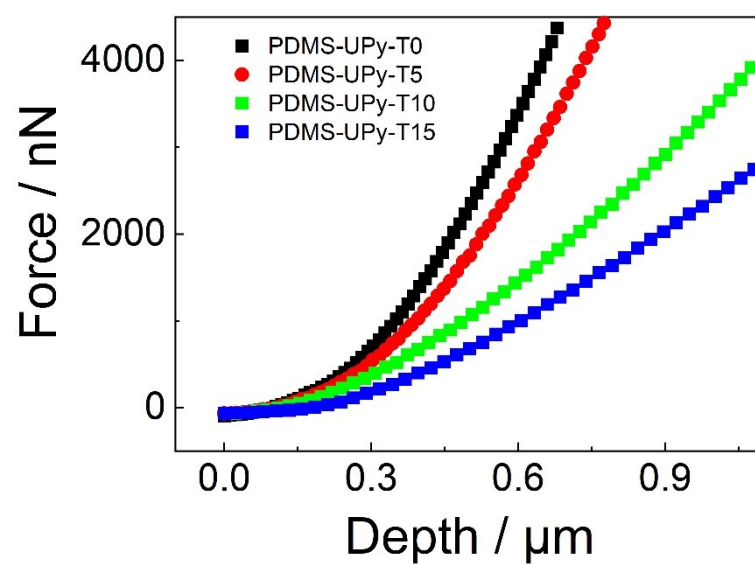

**Fig. S13** Force-depth curves of PDMS-UPy-Tx coatings.
